# Supplementary material
Source: PubMed Central journal article supplement (PMC5814355)
Supplement: NIHMS935372-supplement-supplement_1.pdf [file NIHMS935372-supplement-supplement_1.pdf]

|                                           | Overall<br>n (%) | Under 1<br>n (%) | 1-3<br>n (%) | 4-7<br>n (%) | 8-12<br>n (%) | 13-18<br>n (%) | 19-34<br>n (%) | 35 and Up<br>n (%) | $\chi^2$ p-<br>value |
|-------------------------------------------|------------------|------------------|--------------|--------------|---------------|----------------|----------------|--------------------|----------------------|
| <b>Water Exposure</b>                     |                  |                  |              |              |               |                |                |                    |                      |
| Any water contact                         | 13,568 (66.6)    | 55 (32.2)        | 857 (80.8)   | 1,562 (89.9) | 1,901 (89.0)  | 1,342 (72.4)   | 3,427 (62.6)   | 4,514 (56.0)       | <0.01                |
| Males                                     | 6,210 (45.52)    | 34 (61.8)        | 412 (48.2)   | 789 (50.6)   | 942 (49.7)    | 567 (42.3)     | 1,437 (42.0)   | 2,029 (45.0)       | <0.01                |
| Females                                   | 7,432 (54.5)     | 21 (38.2)        | 442 (51.8)   | 771 (49.4)   | 955 (50.3)    | 775 (57.8)     | 1,985 (58.0)   | 2,483 (55.0)       | <0.01                |
| Body immersion                            | 10,123 (49.4)    | 26 (15.2)        | 647 (61.0)   | 1,370 (78.8) | 1,716 (80.3)  | 1,119 (60.3)   | 2,492 (45.5)   | 2,753 (34.2)       | <0.01                |
| Males                                     | 4,895 (48.4)     | 18 (69.2)        | 312 (48.5)   | 700 (51.2)   | 858 (50.1)    | 505 (45.1)     | 1,132 (49.8)   | 4,895 (48.4)       | <0.01                |
| Females                                   | 5,212 (51.6)     | 8 (30.8)         | 332 (51.6)   | 668 (48.8)   | 854 (49.9)    | 614 (55.9)     | 1,381 (50.2)   | 5,212 (51.6)       | <0.01                |
| Head immersion                            | 7,142 (34.8)     | 15 (8.8)         | 418 (39.4)   | 1,127 (64.8) | 1,540 (72.1)  | 882 (47.6)     | 1,635 (29.9)   | 1,525 (18.9)       | <0.01                |
| Males                                     | 3,853 (54.0)     | 12 (80.0)        | 205 (49.3)   | 581 (51.6)   | 788 (51.3)    | 442 (50.1)     | 903 (55.4)     | 922 (60.5)         | <0.01                |
| Females                                   | 3,276 (46.0)     | 3 (20.0)         | 211 (50.3)   | 545 (48.4)   | 748 (48.7)    | 440 (49.9)     | 728 (44.6)     | 601 (44.6)         | <0.01                |
| Water in mouth                            | 4,036 (20.2)     | 11 (5.9)         | 411 (39.7)   | 849 (51.6)   | 985 (49.1)    | 468 (26.4)     | 704 (13.0)     | 609 (7.7)          | <0.01                |
| Males                                     | 2,170 (53.8)     | 8 (80.0)         | 191 (46.5)   | 444 (52.3)   | 516 (52.4)    | 250 (53.4)     | 393 (55.8)     | 368 (60.4)         | <0.01                |
| Females                                   | 1,866 (46.2)     | 2 (20.0)         | 220 (55.5)   | 405 (47.7)   | 469 (47.6)    | 218 (46.6)     | 311 (44.2)     | 241 (39.6)         | <0.01                |
| Swallow water                             | 1,652 (8.1)      | 8 (4.7)          | 263 (24.8)   | 420 (24.2)   | 417 (19.5)    | 145 (7.8)      | 226 (4.1)      | 173 (2.2)          | <0.01                |
| Males                                     | 908 (55.0)       | 6 (75.0)         | 134 (51.0)   | 223 (53.1)   | 232 (55.6)    | 80 (55.2)      | 129 (57.1)     | 104 (60.1)         | 0.43                 |
| Females                                   | 744 (45.0)       | 2 (25.0)         | 129 (49.0)   | 197 (46.9)   | 185 (44.4)    | 65 (44.8)      | 97 (42.9)      | 69 (39.9)          | 0.05 <sup>b</sup>    |
| Wear nose plugs                           | 49 (0.24)        | 1 (0.6)          | 3 (0.3)      | 6 (0.4)      | 10 (0.5)      | 6 (0.3)        | 12 (0.2)       | 11 (0.1)           | 0.05 <sup>b</sup>    |
| Males                                     | 18 (36.7)        | 1 (100.0)        | 0 (0.0)      | 4 (66.7)     | 1 (10.0)      | 4 (66.7)       | 3 (25.0)       | 5 (45.5)           | 0.05 <sup>b</sup>    |
| Females                                   | 31 (63.3)        | 0 (0.0)          | 3 (100.0)    | 2 (33.3)     | 9 (90.0)      | 2 (33.3)       | 9 (75.0)       | 6 (54.5)           | <0.01                |
| Wear mask/goggles                         | 753 (3.7)        | 1 (0.8)          | 20 (1.8)     | 204 (11.8)   | 323 (15.1)    | 61 (3.3)       | 55 (1.0)       | 89 (1.1)           | <0.01                |
| Males                                     | 396 (52.6)       | 1 (100.0)        | 9 (45.0)     | 104 (51.0)   | 163 (50.5)    | 35 (57.4)      | 27 (49.1)      | 57 (64.0)          | 0.26                 |
| Females                                   | 357 (47.4)       | 0 (0.0)          | 11 (55.0)    | 100 (49.0)   | 160 (49.5)    | 26 (42.6)      | 28 (50.9)      | 32 (36.0)          |                      |
| <b>Sand Exposure</b>                      |                  |                  |              |              |               |                |                |                    |                      |
| Digging in sand                           | 8,975 (43.9)     | 56 (33.0)        | 915 (86.3)   | 1,523 (87.8) | 1,641 (77.2)  | 764 (41.4)     | 1,891 (34.6)   | 2,185 (27.2)       | <0.01                |
| Males                                     | 4,187 (46.7)     | 38 (67.9)        | 438 (48.0)   | 767 (50.4)   | 828 (50.6)    | 361 (47.3)     | 773 (41.0)     | 982 (45.0)         | <0.01                |
| Females                                   | 4,773 (53.3)     | 18 (32.1)        | 474 (52.0)   | 754 (49.6)   | 809 (49.4)    | 403 (52.8)     | 1,114 (59.0)   | 1,201 (55.0)       | <0.01                |
| Body buried in sand                       | 2,172 (10.6)     | 11 (6.4)         | 239 (22.6)   | 527 (30.4)   | 581 (27.3)    | 204 (11.0)     | 331 (6.1)      | 279 (3.5)          | <0.01                |
| Males                                     | 1,077 (49.7)     | 6 (54.6)         | 112 (47.1)   | 264 (50.3)   | 309 (53.2)    | 108 (53.0)     | 150 (45.3)     | 128 (45.9)         | 0.19                 |
| Females                                   | 1,092 (50.4)     | 5 (45.5)         | 126 (52.9)   | 261 (49.7)   | 272 (46.8)    | 96 (47.1)      | 181 (54.7)     | 151 (54.1)         |                      |
| <b>Algae/Seaweed Exposure</b>             |                  |                  |              |              |               |                |                |                    |                      |
| Touched or had contact with algae/seaweed | 370 (1.8)        | 0 (0.0)          | 27 (2.6)     | 63 (3.7)     | 110 (5.2)     | 34 (1.8)       | 55 (1.0)       | 81 (1.0)           | <0.01                |
| Males                                     | 184 (49.7)       | 0 (0.0)          | 12 (44.4)    | 37 (58.7)    | 50 (45.5)     | 18 (52.9)      | 25 (45.5)      | 42 (51.8)          | 0.57                 |
| Females                                   | 186 (50.3)       | 0 (0.0)          | 15 (55.6)    | 26 (41.3)    | 60 (55.5)     | 16 (47.1)      | 30 (55.5)      | 39 (48.2)          |                      |

Table S1: Exposure by age category and sex, Freshwater <sup>a</sup>

Table S2: Exposure by age category and sex, Marine <sup>a</sup>

---

<sup>a</sup> Huntington, Silver, Washington Park, West

<sup>b</sup> Fisher's exact test

|                                                 | Overall<br>n (%) | Under 1<br>n (%) | 1-3<br>n (%) | 4-7<br>n (%) | 8-12<br>n (%) | 13-18<br>n (%) | 19-34<br>n (%) | 35 and Up<br>n (%) | $\chi^2$ p-<br>value |
|-------------------------------------------------|------------------|------------------|--------------|--------------|---------------|----------------|----------------|--------------------|----------------------|
| <b>Water Exposure</b>                           |                  |                  |              |              |               |                |                |                    |                      |
| Any water contact                               | 31,685 (67.1)    | 136 (38.9)       | 1,977 (73.6) | 3,784 (88.8) | 4,848 (89.8)  | 3,170 (78.8)   | 6,688 (62.0)   | 11,082 (56.1)      | <0.01                |
| Males                                           | 15,475 (49.0)    | 70 (51.5)        | 1,013 (51.5) | 1,958 (51.9) | 2,422 (50.3)  | 1,523 (48.2)   | 3,065 (45.9)   | 5,424 (49.0)       | <0.01                |
| Females                                         | 16,120 (51.0)    | 66 (49.5)        | 953 (48.5)   | 1,814 (48.1) | 2,397 (49.7)  | 1,636 (51.8)   | 3,612 (54.1)   | 5,642 (51.0)       | <0.01                |
| Body immersion                                  | 24,516 (51.9)    | 77 (22.0)        | 1,411 (52.5) | 3,122 (73.3) | 4,292 (79.5)  | 2,749 (68.4)   | 5,016 (46.5)   | 7,849 (39.8)       | <0.01                |
| Males                                           | 12,459 (51.0)    | 44 (57.1)        | 739 (52.6)   | 1,638 (52.6) | 2,156 (50.5)  | 1,360 (49.6)   | 2,353 (47.0)   | 4,169 (53.2)       | <0.01                |
| Females                                         | 11,987 (49.0)    | 33 (42.9)        | 665 (47.4)   | 1,474 (47.4) | 2,110 (49.5)  | 1,380 (50.4)   | 2,656 (53.0)   | 3,669 (46.8)       | <0.01                |
| Head immersion                                  | 19,184 (40.6)    | 50 (14.3)        | 903 (33.6)   | 2,507 (58.9) | 3,852 (71.4)  | 2,389 (59.4)   | 3,832 (35.5)   | 5,651 (28.6)       | <0.01                |
| Males                                           | 10,438 (54.6)    | 31 (62.0)        | 480 (53.6)   | 1,334 (53.3) | 1,975 (51.6)  | 1,239 (52.1)   | 1,984 (51.9)   | 3,395 (60.2)       | <0.01                |
| Females                                         | 8,684 (45.4)     | 19 (38.0)        | 416 (46.4)   | 1,167 (46.7) | 1,853 (48.4)  | 1,141 (47.9)   | 1,841 (48.1)   | 2,247 (39.8)       | <0.01                |
| Water in mouth                                  | 14,558 (31.0)    | 46 (13.2)        | 920 (34.6)   | 2,123 (50.2) | 3,061 (57.2)  | 1,799 (45.1)   | 2,806 (26.2)   | 3,803 (19.3)       | <0.01                |
| Males                                           | 7,898 (54.4)     | 29 (63.0)        | 491 (53.5)   | 1,151 (54.3) | 1,575 (51.8)  | 932 (51.9)     | 1,445 (51.5)   | 2,275 (59.9)       | <0.01                |
| Females                                         | 6,621 (45.6)     | 17 (37.0)        | 426 (46.5)   | 967 (45.7)   | 1,468 (48.2)  | 863 (48.1)     | 1,359 (48.5)   | 1,521 (40.1)       | <0.01                |
| Swallow water                                   | 6,458 (13.7)     | 34 (9.7)         | 594 (22.1)   | 1,167 (27.4) | 1,532 (28.4)  | 764 (19.0)     | 1,069 (9.9)    | 1,298 (6.6)        | <0.01                |
| Males                                           | 3,518 (54.7)     | 20 (58.8)        | 311 (52.5)   | 644 (55.4)   | 815 (53.6)    | 408 (53.6)     | 552 (51.6)     | 768 (59.3)         | <0.01                |
| Females                                         | 2,918 (45.3)     | 14 (41.2)        | 281 (47.5)   | 519 (44.6)   | 707 (46.5)    | 353 (46.4)     | 517 (48.4)     | 527 (40.7)         | <0.01                |
| Wear nose plugs                                 | 136 (0.4)        | 0 (0.0)          | 6 (0.3)      | 15 (0.4)     | 28 (0.6)      | 20 (0.6)       | 28 (0.4)       | 39 (0.3)           | 0.06 <sup>b</sup>    |
| Males                                           | 64 (47.8)        | 0 (0.0)          | 2 (40.0)     | 6 (40.0)     | 14 (50.0)     | 11 (55.0)      | 13 (48.2)      | 18 (46.2)          | 0.96                 |
| Females                                         | 70 (52.2)        | 0 (0.0)          | 3 (60.0)     | 9 (60.0)     | 14 (50.0)     | 9 (45.0)       | 14 (51.8)      | 21 (53.8)          | 0.96                 |
| Wear mask/goggles                               | 2,401 (6.7)      | 4 (1.8)          | 33 (1.6)     | 406 (10.6)   | 699 (14.3)    | 333 (9.8)      | 307 (3.9)      | 619 (4.5)          | <0.01                |
| Males                                           | 1,329 (55.5)     | 4 (100.0)        | 20 (60.6)    | 236 (58.3)   | 346 (49.6)    | 194 (58.4)     | 156 (51.0)     | 373 (60.4)         | <0.01                |
| Females                                         | 1,067 (44.5)     | 0 (0.0)          | 13 (39.4)    | 169 (41.7)   | 352 (50.4)    | 138 (41.6)     | 150 (49.0)     | 245 (39.6)         | <0.01                |
| <b>Sand Exposure</b>                            |                  |                  |              |              |               |                |                |                    |                      |
| Digging in sand                                 | 17,057 (36.4)    | 93 (26.8)        | 1,917 (71.8) | 3,238 (76.4) | 3,196 (59.6)  | 1,293 (32.4)   | 3,014 (28.2)   | 4,306 (22.0)       | <0.01                |
| Males                                           | 8,258 (48.6)     | 49 (52.7)        | 955 (50.1)   | 1,656 (51.3) | 1,584 (49.9)  | 630 (48.9)     | 1,376 (45.5)   | 2,017 (46.9)       | <0.01                |
| Females                                         | 8,744 (51.4)     | 44 (47.3)        | 953 (49.9)   | 1,572 (48.7) | 1,592 (50.1)  | 658 (51.1)     | 1,641 (54.5)   | 2,284 (53.1)       | <0.01                |
| Body buried in sand                             | 2,390 (7.1)      | 8 (3.8)          | 291 (11.8)   | 634 (16.4)   | 611 (13.9)    | 233 (8.5)      | 301 (3.9)      | 312 (2.5)          | <0.01                |
| Males                                           | 1,198 (50.4)     | 6 (75.0)         | 149 (51.7)   | 320 (50.5)   | 306 (50.4)    | 109 (47.6)     | 153 (51.2)     | 155 (49.8)         | <0.01                |
| Females                                         | 1,178 (49.6)     | 2 (25.0)         | 139 (48.3)   | 314 (49.5)   | 301 (49.6)    | 120 (52.4)     | 146 (48.8)     | 156 (50.2)         | <0.01                |
| Sand in mouth <sup>c</sup>                      | 4,693 (12.8)     | 83 (24.7)        | 867 (18.5)   | 886 (18.9)   | 732 (15.6)    | 345 (7.4)      | 781 (16.6)     | 999 (21.3)         | <0.01                |
| Males                                           | 2,279 (48.7)     | 42 (50.6)        | 450 (52.1)   | 490 (55.4)   | 380 (52.1)    | 183 (53.2)     | 309 (39.6)     | 425 (42.5)         | <0.01                |
| Females                                         | 2,405 (51.4)     | 41 (49.4)        | 413 (47.9)   | 395 (44.6)   | 350 (47.9)    | 161 (46.8)     | 471 (60.4)     | 574 (57.6)         | <0.01                |
| Was sand wet? <sup>c</sup>                      | 6,640 (49.3)     | 37 (39.8)        | 712 (47.0)   | 1,430 (55.4) | 1,369 (55.9)  | 502 (50.1)     | 874 (38.8)     | 1,716 (48.2)       | <0.01                |
| Males                                           | 3,219 (48.6)     | 26 (70.3)        | 353 (49.9)   | 722 (50.6)   | 703 (51.5)    | 248 (49.5)     | 369 (42.2)     | 798 (46.5)         | <0.01                |
| Females                                         | 3,410 (51.4)     | 11 (29.7)        | 355 (50.1)   | 705 (49.4)   | 663 (48.5)    | 253 (50.5)     | 505 (57.8)     | 918 (53.5)         | <0.01                |
| Eat/drink after<br>playing in sand <sup>d</sup> | 3,049 (57.2)     | 21 (51.2)        | 324 (60.1)   | 499 (57.0)   | 491 (56.8)    | 251 (58.8)     | 555 (54.2)     | 908 (58.1)         | 0.28                 |
| Males                                           | 1,412 (46.3)     | 13 (61.9)        | 159 (49.1)   | 267 (53.5)   | 237 (48.3)    | 126 (50.2)     | 227 (40.9)     | 383 (42.2)         | <0.01                |

|                                                      |              |           |            |            |            |            |            |              |       |
|------------------------------------------------------|--------------|-----------|------------|------------|------------|------------|------------|--------------|-------|
| <i>Females</i>                                       | 1,637 (53.7) | 8 (38.1)  | 165 (50.9) | 232 (46.5) | 254 (51.7) | 125 (49.8) | 328 (59.1) | 525 (57.8)   |       |
| Wash hands after playing in sand <sup>c</sup>        | 4,437 (39.9) | 31 (43.1) | 524 (40.6) | 885 (40.5) | 790 (38.2) | 338 (41.2) | 689 (38.8) | 1,180 (40.6) | 0.50  |
| <i>Males</i>                                         | 2,053 (46.3) | 17 (54.8) | 253 (48.4) | 429 (48.5) | 398 (50.4) | 171 (50.6) | 269 (39.0) | 516 (43.8)   | <0.01 |
| <i>Females</i>                                       | 2,381 (53.7) | 14 (45.2) | 270 (51.6) | 456 (51.5) | 391 (49.6) | 167 (49.4) | 420 (61.0) | 663 (56.2)   |       |
| <b>Algae/Seaweed Exposure</b>                        |              |           |            |            |            |            |            |              |       |
| Touched or had contact with algae/seaweed            | 4,930 (10.5) | 13 (3.8)  | 396 (14.9) | 860 (20.4) | 953 (17.8) | 454 (11.4) | 838 (7.9)  | 1,416 (7.3)  | <0.01 |
| <i>Males</i>                                         | 2,459 (50.0) | 6 (46.2)  | 200 (50.5) | 438 (51.1) | 476 (50.2) | 223 (49.1) | 398 (47.6) | 718 (50.8)   | 0.80  |
| <i>Females</i>                                       | 2,460 (50.0) | 7 (53.8)  | 196 (49.5) | 419 (48.9) | 472 (49.8) | 231 (50.9) | 439 (52.5) | 696 (49.2)   |       |
| Seaweed/algae in mouth <sup>e</sup>                  | 246 (1.3)    | 6 (3.7)   | 23 (2.3)   | 38 (2.1)   | 43 (2.0)   | 23 (1.4)   | 45 (1.0)   | 68 (0.8)     | <0.01 |
| <i>Males</i>                                         | 115 (47.1)   | 2 (33.3)  | 12 (52.2)  | 18 (47.4)  | 16 (38.1)  | 15 (65.2)  | 16 (36.4)  | 36 (52.9)    | 0.23  |
| <i>Females</i>                                       | 129 (52.9)   | 4 (66.7)  | 11 (47.8)  | 20 (52.6)  | 26 (61.9)  | 8 (34.8)   | 28 (63.6)  | 32 (47.1)    |       |
| Wash hands after touching algae/seaweed <sup>f</sup> | 1,257 (32.0) | 3 (30.0)  | 107 (33.9) | 255 (36.0) | 250 (33.8) | 100 (27.0) | 178 (27.7) | 364 (32.0)   | 0.01  |
| <i>Males</i>                                         | 609 (48.6)   | 1 (33.3)  | 48 (44.9)  | 115 (45.1) | 121 (48.8) | 48 (48.0)  | 89 (50.0)  | 187 (51.5)   | 0.74  |
| <i>Females</i>                                       | 645 (51.4)   | 2 (66.7)  | 59 (55.1)  | 140 (54.9) | 127 (51.2) | 52 (52.0)  | 89 (50.0)  | 176 (48.5)   |       |

<sup>a</sup> Avalon, Doheny, Edgewater, Fairhope, Goddard, Malibu, Mission Bay, and Surfside

<sup>b</sup> Fisher's exact test

<sup>c</sup> Only collected on a subset of samples from Avalon, Doheny, Edgewater, Fairhope, Goddard, Malibu, and Surfside

<sup>d</sup> Only collected on a subset of samples from Fairhope, Goddard, and Surfside

<sup>e</sup> Only collected on a subset of samples from Avalon, Doheny, Malibu, and Surfside

<sup>f</sup> Only collected on a subset of samples from Avalon, Doheny, Fairhope, Goddard, Malibu, and Surfside

Table S3: Estimated volume (mL) of water swallowed per swimming event, among those who submerged their head

| <i>All</i>                  |       |
|-----------------------------|-------|
| <b>All Ages</b>             |       |
| Mean                        | 56.4  |
| Median                      | 21.8  |
| Standard Deviation          | 109.2 |
| 5 <sup>th</sup> percentile  | 1.3   |
| 10 <sup>th</sup> percentile | 2.7   |
| 90 <sup>th</sup> percentile | 134.0 |
| 95 <sup>th</sup> percentile | 214.7 |
| <b>Children 6-12</b>        |       |
| Mean                        | 72.0  |
| Median                      | 42.7  |
| Standard Deviation          | 91.9  |
| 5 <sup>th</sup> percentile  | 3.6   |
| 10 <sup>th</sup> percentile | 7.0   |
| 90 <sup>th</sup> percentile | 172.0 |
| 95 <sup>th</sup> percentile | 240.0 |
| <b>Ages 13-18</b>           |       |
| Mean                        | 79.8  |
| Median                      | 36.7  |
| Standard Deviation          | 122.3 |
| 5 <sup>th</sup> percentile  | 2.7   |
| 10 <sup>th</sup> percentile | 4.7   |
| 90 <sup>th</sup> percentile | 201.0 |
| 95 <sup>th</sup> percentile | 304.5 |
| <b>Adults 19-34</b>         |       |
| Mean                        | 41.0  |
| Median                      | 15.3  |
| Standard Deviation          | 89.2  |
| 5 <sup>th</sup> percentile  | 1.0   |
| 10 <sup>th</sup> percentile | 2.0   |
| 90 <sup>th</sup> percentile | 93.3  |
| 95 <sup>th</sup> percentile | 156.0 |
| <b>Adults 35 and over</b>   |       |
| Mean                        | 41.1  |
| Median                      | 13.0  |
| Standard Deviation          | 105.2 |
| 5 <sup>th</sup> percentile  | 0.9   |
| 10 <sup>th</sup> percentile | 1.7   |
| 90 <sup>th</sup> percentile | 88.0  |
| 95 <sup>th</sup> percentile | 157.3 |

Table S4: Estimated volume (mL) of water swallowed per swimming event, by gender, with alternate age

|                             | <i>All</i> | <i>Females</i> | <i>Males</i> | <i>Freshwater</i> | <i>Marine</i> |
|-----------------------------|------------|----------------|--------------|-------------------|---------------|
| <b>All Ages</b>             |            |                |              |                   |               |
| Mean                        | 44.5       | 32.0           | 57.3         | 35.4              | 48.3          |
| Median                      | 16.0       | 12.0           | 21.3         | 12.7              | 18.0          |
| Standard Deviation          | 93.9       | 69.5           | 110.0        | 74.6              | 99.3          |
| 5 <sup>th</sup> percentile  | 1.0        | 0.7            | 1.4          | 0.8               | 1.2           |
| 10 <sup>th</sup> percentile | 2.0        | 1.3            | 2.7          | 1.3               | 2.0           |
| 90 <sup>th</sup> percentile | 105.0      | 76.0           | 140.0        | 84.0              | 116.0         |
| 95 <sup>th</sup> percentile | 174.0      | 121.3          | 232.0        | 140.0             | 186.7         |
| <b>Children 6-10</b>        |            |                |              |                   |               |

categories

|                             |       |       |       |       |       |
|-----------------------------|-------|-------|-------|-------|-------|
| Mean                        | 69.8  | 66.9  | 73.5  | 58.9  | 74.4  |
| Median                      | 40.0  | 37.0  | 42.0  | 34.0  | 43.7  |
| Standard Deviation          | 91.3  | 93.7  | 85.2  | 77.0  | 96.2  |
| 5 <sup>th</sup> percentile  | 3.0   | 3.0   | 2.7   | 2.5   | 3.3   |
| 10 <sup>th</sup> percentile | 6.3   | 5.8   | 7.0   | 5.3   | 6.7   |
| 90 <sup>th</sup> percentile | 164.0 | 154.0 | 184.0 | 142.0 | 180.0 |
| 95 <sup>th</sup> percentile | 230.0 | 216.0 | 241.5 | 200.0 | 245.0 |
| <b>Ages 11-17</b>           |       |       |       |       |       |
| Mean                        | 70.4  | 47.9  | 82.1  | 55.5  | 75.6  |
| Median                      | 32.0  | 24.0  | 37.3  | 24.3  | 35.0  |
| Standard Deviation          | 111.3 | 66.8  | 125.3 | 89.1  | 117.3 |
| 5 <sup>th</sup> percentile  | 2.4   | 1.6   | 3.0   | 1.7   | 2.7   |
| 10 <sup>th</sup> percentile | 4.0   | 2.9   | 5.3   | 3.1   | 4.9   |
| 90 <sup>th</sup> percentile | 170.7 | 122.7 | 204.0 | 140.0 | 186.7 |
| 95 <sup>th</sup> percentile | 272.0 | 177.6 | 312.0 | 212.0 | 289.8 |
| <b>Adults 18 and over</b>   |       |       |       |       |       |
| Mean                        | 29.1  | 20.4  | 41.8  | 21.9  | 32.4  |
| Median                      | 9.3   | 6.7   | 13.3  | 6.7   | 10.5  |
| Standard Deviation          | 76.0  | 55.8  | 100.5 | 58.5  | 83.9  |
| 5 <sup>th</sup> percentile  | 0.7   | 0.4   | 0.9   | 0.4   | 0.7   |
| 10 <sup>th</sup> percentile | 1.1   | 0.8   | 1.8   | 0.9   | 1.3   |
| 90 <sup>th</sup> percentile | 64.0  | 43.3  | 90.7  | 46.7  | 72.0  |
| 95 <sup>th</sup> percentile | 116.0 | 78.0  | 174.0 | 85.3  | 121.3 |

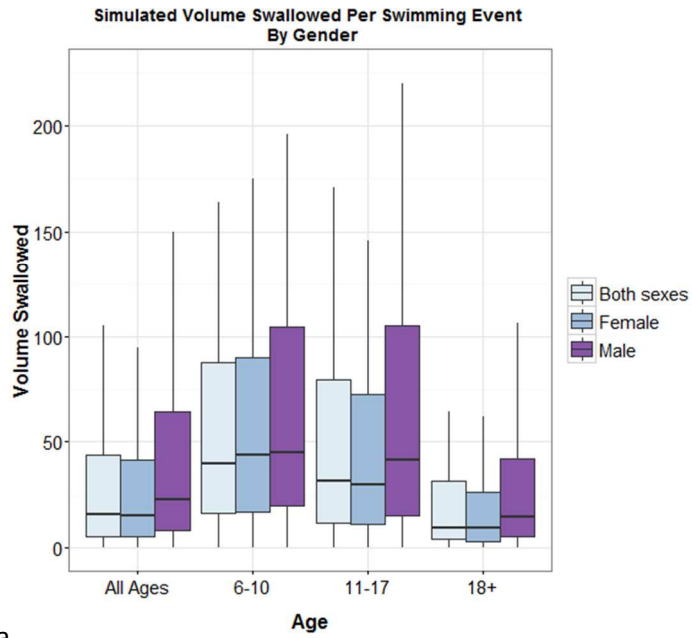

a

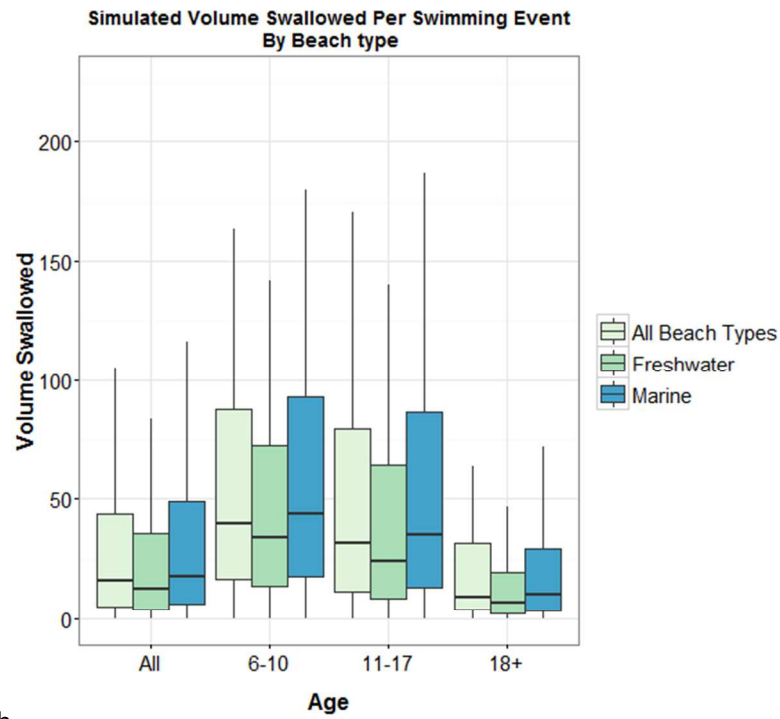

b

Figure S1: Estimated volume (mL) of water swallowed for each age category per swimming event by (a) sex and (b) water type (freshwater and marine), with alternate age categories
